# Supplementary material
Source: MDPI journal article supplement (https://www.mdpi.com/2072-4292/13/24/5090)
Supplement: s1 [file s1]

# Global change of land sparing and land sharing pattern over the past 30 years: evidences from remote sensing and statistics

Jianqiao Zhao <sup>1,\*\*</sup>, Yue Cao <sup>2,3,\*\*</sup> and Le Yu <sup>1,4,\*</sup>

<sup>1</sup> Department of Earth System Science, Ministry of Education Key Laboratory for Earth System Modeling, Institute for Global Change Studies, Tsinghua University, Beijing 100084, China

<sup>2</sup> Institute for National Parks, Tsinghua University, Beijing 100084, China

<sup>3</sup> Department of Landscape Architecture, School of Architecture, Tsinghua University, Beijing 100084, China

<sup>4</sup> Ministry of Education Ecological Field Station for East Asian Migratory Birds, Beijing 100084, China

\* Correspondence: leyu@tsinghua.edu.cn

\*\* Contributed equally

## Supplementary Information

**Table S1.** Hotspots for increasing land sparing

| Ecoregion name                               | Ecoregion code | Mean LSS change rate |
|----------------------------------------------|----------------|----------------------|
| South Malawi montane forest-grassland mosaic | AT1014         | 0.02062              |
| Sumatran peat swamp forests                  | IM0160         | 0.01052              |
| Cardamom Mountains rain forests              | IM0106         | 0.00975              |
| Mascarene forests                            | AT0120         | 0.00904              |
| Tocantins/Pindare moist forests              | NT0170         | 0.00894              |
| Peninsular Malaysian peat swamp forests      | IM0145         | 0.00871              |
| Kazakh upland                                | PA0811         | 0.00781              |
| South Taiwan monsoon rain forests            | IM0171         | 0.00779              |
| Kazakh steppe                                | PA0810         | 0.00745              |
| Sundaland heath forests                      | IM0161         | 0.00743              |
| Borneo peat swamp forests                    | IM0104         | 0.00740              |
| Southern Korea evergreen forests             | PA0439         | 0.00733              |
| Southeast Australia temperate savanna        | AA0803         | 0.00726              |
| Southeastern Indochina dry evergreen forests | IM0210         | 0.00723              |
| Xingu-Tocantins-Araguaia moist forests       | NT0180         | 0.00706              |
| Mount Cameroon and Bioko montane forests     | AT0121         | 0.00694              |
| Mato Grosso seasonal forests                 | NT0140         | 0.00660              |
| Sumatran freshwater swamp forests            | IM0157         | 0.00621              |
| Chiquitano dry forests                       | NT0212         | 0.00620              |
| Jamaican dry forests                         | NT0218         | 0.00609              |
| Jos Plateau forest-grassland mosaic          | AT1010         | 0.00600              |
| Western Guinean lowland forests              | AT0130         | 0.00594              |
| Central Korean deciduous forests             | PA0413         | 0.00561              |
| Maputaland coastal forest mosaic             | AT0119         | 0.00543              |
| Nenjiang River grassland                     | PA0903         | 0.00511              |
| Knysna-Amatole montane forests               | AT0115         | 0.00507              |

|                                              |        |         |
|----------------------------------------------|--------|---------|
| Madeira-Tapajós moist forest                 | NT0135 | 0.00507 |
| KwaZulu-Cape coastal forest mosaic           | AT0116 | 0.00498 |
| Dry Chaco                                    | NT0210 | 0.00478 |
| Bajío dry forests                            | NT0204 | 0.00464 |
| Mediterranean woodlands and forests          | PA1214 | 0.00451 |
| Petén-Veracruz moist forests                 | NT0154 | 0.00451 |
| Altai steppe and semi-desert                 | PA0802 | 0.00440 |
| Central Mexican matorral                     | NA1302 | 0.00438 |
| Hokkaido montane conifer forests             | PA0510 | 0.00428 |
| West Sudanian savanna                        | AT0722 | 0.00420 |
| Southwest Borneo freshwater swamp forests    | IM0153 | 0.00415 |
| Trans-Mexican Volcanic Belt pine-oak forests | NT0310 | 0.00403 |
| Emin Valley steppe                           | PA0806 | 0.00394 |
| Jian Nan subtropical evergreen forests       | IM0118 | 0.00393 |
| Tehuacán Valley matorral                     | NT1316 | 0.00390 |
| Eastern Anatolian montane steppe             | PA0805 | 0.00388 |
| Southern Miombo woodlands                    | AT0719 | 0.00385 |
| Tapajós-Xingu moist forests                  | NT0168 | 0.00384 |
| Southeastern Iberian shrubs and woodlands    | PA1219 | 0.00376 |
| Caspian Hyrcanian mixed forests              | PA0407 | 0.00366 |
| Gulf of St. Lawrence lowland forests         | NA0408 | 0.00362 |
| Jamaican moist forests                       | NT0131 | 0.00360 |
| Southern Annamites montane rain forests      | IM0152 | 0.00355 |
| Zagros Mountains forest steppe               | PA0446 | 0.00351 |
| Central American Atlantic moist forests      | NT0111 | 0.00350 |
| Southern Africa mangroves                    | AT1405 | 0.00345 |
| Cross-Sanaga-Bioko coastal forests           | AT0107 | 0.00342 |
| Jalisco dry forests                          | NT0217 | 0.00338 |
| Maputaland-Pondoland bushland and thickets   | AT1012 | 0.00335 |
| Helanshan montane conifer forests            | PA0508 | 0.00334 |
| Guinean forest-savanna mosaic                | AT0707 | 0.00326 |
| Cantabrian mixed forests                     | PA0406 | 0.00322 |
| Pontic steppe                                | PA0814 | 0.00311 |
| Palau tropical moist forests                 | OC0110 | 0.00311 |
| Northeast China Plain deciduous forests      | PA0430 | 0.00311 |
| Kopet Dag semi-desert                        | PA1319 | 0.00306 |

**Table S2.** Hotspots for decreasing land sparing

| <b>Ecoregion name</b>        | <b>Ecoregion code</b> | <b>Mean LSS<br/>change rate</b> |
|------------------------------|-----------------------|---------------------------------|
| Vanuatu rain forests         | AA0126                | -0.01577                        |
| Guayaquil flooded grasslands | NT0905                | -0.01138                        |
| Puerto Rican moist forests   | NT0155                | -0.00748                        |

|                                                      |        |          |
|------------------------------------------------------|--------|----------|
| Eastern Arc forests                                  | AT0109 | -0.00630 |
| Puerto Rican dry forests                             | NT0226 | -0.00608 |
| Lesser Sundas deciduous forests                      | AA0201 | -0.00538 |
| Cauca Valley dry forests                             | NT0207 | -0.00471 |
| Motagua Valley thornscrub                            | NT1312 | -0.00410 |
| Lara-Fal drycon forests                              | NT0219 | -0.00398 |
| Costa Rican seasonal moist forests                   | NT0119 | -0.00393 |
| Naracoorte woodlands                                 | AA1208 | -0.00342 |
| Sumba deciduous forests                              | AA0203 | -0.00340 |
| Western Java rain forests                            | IM0168 | -0.00334 |
| New Britain-New Ireland montane rain forests         | AA0112 | -0.00333 |
| East African halophytics                             | AT0901 | -0.00329 |
| Western Java montane rain forests                    | IM0167 | -0.00298 |
| Southern Mesoamerican Pacific mangroves              | NT1407 | -0.00297 |
| Western Ecuador moist forests                        | NT0178 | -0.00295 |
| Maranhão Babaçu forests                              | NT0139 | -0.00292 |
| Hispaniolan moist forests                            | NT0127 | -0.00292 |
| Sierra de la Laguna dry forests                      | NT0227 | -0.00289 |
| Angolan scarp savanna and woodlands                  | AT1002 | -0.00284 |
| Hispaniolan dry forests                              | NT0215 | -0.00281 |
| Ecuadorian dry forests                               | NT0214 | -0.00276 |
| Sierra Madre de Chiapas moist forests                | NT0162 | -0.00275 |
| Central American dry forests                         | NT0209 | -0.00258 |
| Sao Tome, Principe and Annobon moist lowland forests | AT0127 | -0.00251 |
| Southern Atlantic mangroves                          | NT1406 | -0.00242 |
| Yucatán dry forests                                  | NT0235 | -0.00242 |
| Araucaria moist forests                              | NT0101 | -0.00238 |
| Chiapas Depression dry forests                       | NT0211 | -0.00233 |
| Eastern Java-Bali montane rain forests               | IM0112 | -0.00232 |
| Bahia coastal forests                                | NT0103 | -0.00231 |
| Sundarbans freshwater swamp forests                  | IM0162 | -0.00221 |
| Illyrian deciduous forests                           | PA1210 | -0.00217 |
| Mindanao-Eastern Visayas rain forests                | IM0129 | -0.00209 |
| Catatumbo moist forests                              | NT0108 | -0.00202 |
| Northern Anatolian conifer and deciduous forests     | PA0515 | -0.00202 |
| Edwards Plateau savanna                              | NA0806 | -0.00201 |
| Sulu Archipelago rain forests                        | IM0156 | -0.00197 |
| Pindus Mountains mixed forests                       | PA1217 | -0.00195 |
| Western Congolian forest-savanna mosaic              | AT0723 | -0.00194 |
| Pantanos de Centla                                   | NT0148 | -0.00192 |
| Central American pine-oak forests                    | NT0303 | -0.00190 |
| Trans Fly savanna and grasslands                     | AA0708 | -0.00189 |
| Serra do Mar coastal forests                         | NT0160 | -0.00189 |

|                                                                   |        |          |
|-------------------------------------------------------------------|--------|----------|
| South Florida rocklands                                           | NT0164 | -0.00185 |
| Northern Zanzibar-Inhambane coastal forest<br>mosaic              | AT0125 | -0.00182 |
| Rodope montane mixed forests                                      | PA0435 | -0.00178 |
| Sierra de los Tuxtlas                                             | NT0161 | -0.00174 |
| Sinú Valley dry forests                                           | NT0229 | -0.00172 |
| New Caledonia dry forests                                         | AA0202 | -0.00166 |
| Central European mixed forests                                    | PA0412 | -0.00163 |
| Peninsular Malaysian montane rain forests                         | IM0144 | -0.00159 |
| Chimalapas montane forests                                        | NT0114 | -0.00154 |
| Florida sand pine scrub                                           | NA0513 | -0.00149 |
| Sierra de la Laguna pine-oak forests                              | NT0307 | -0.00149 |
| North Island temperate forests                                    | AA0405 | -0.00148 |
| South American Pacific mangroves                                  | NT1405 | -0.00148 |
| Khangai Mountains conifer forests                                 | PA0512 | -0.00144 |
| Northland temperate kauri forests                                 | AA0406 | -0.00140 |
| Isthmian-Pacific moist forests                                    | NT0130 | -0.00138 |
| Banda Sea Islands moist deciduous forests                         | AA0102 | -0.00137 |
| Daba Mountains evergreen forests                                  | PA0417 | -0.00130 |
| Balkan mixed forests                                              | PA0404 | -0.00126 |
| Southern Pacific dry forests                                      | NT0230 | -0.00124 |
| Eastern Java-Bali rain forests                                    | IM0113 | -0.00123 |
| Mesoamerican Gulf-Caribbean mangroves                             | NT1403 | -0.00120 |
| Cuban wetlands                                                    | NT0902 | -0.00119 |
| Luzon rain forests                                                | IM0123 | -0.00118 |
| East European forest steppe                                       | PA0419 | -0.00118 |
| Carpathian montane forests                                        | PA0504 | -0.00116 |
| Maldives-Lakshadweep-Chagos Archipelago<br>tropical moist forests | IM0125 | -0.00116 |
| Araya and Paria xeric scrub                                       | NT1301 | -0.00116 |
| Bahia interior forests                                            | NT0104 | -0.00116 |
| Isthmian-Atlantic moist forests                                   | NT0129 | -0.00115 |
| New Caledonia rain forests                                        | AA0113 | -0.00113 |
| Atlantic Coast restingas                                          | NT0102 | -0.00112 |
| Ethiopian montane moorlands                                       | AT1008 | -0.00110 |
| Sri Lanka lowland rain forests                                    | IM0154 | -0.00108 |
| Magdalena Valley dry forests                                      | NT0221 | -0.00107 |
| Veracruz dry forests                                              | NT0233 | -0.00106 |
| Western European broadleaf forests                                | PA0445 | -0.00103 |
| Yunnan Plateau subtropical evergreen forests                      | PA0102 | -0.00103 |

---
